# Supplementary material for: Biomass-derived isosorbide-based thermoresponsive hydrogel for drug delivery
Source: Royal Society of Chemistry journal article supplement (doi:10.1039/d2sm00623e), 2022-01-01
Supplement: d2sm00623e1.pdf [file d2sm00623e1.pdf]

## Supporting Information

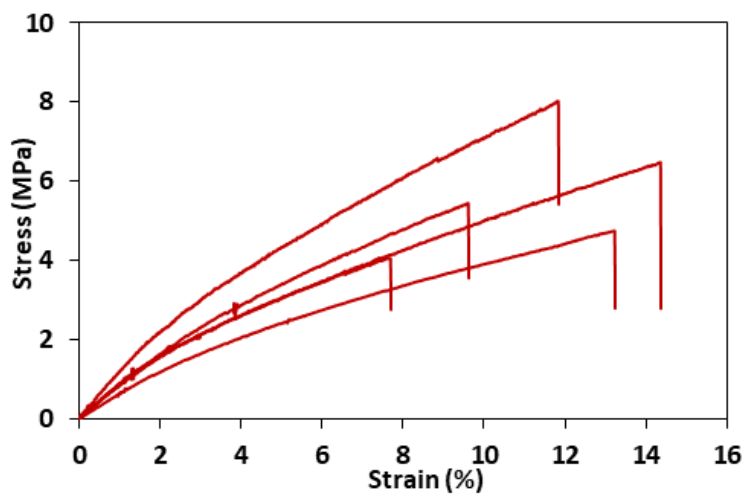

**Figure S1.** Tensile tests measurements from which average-values of Young's modulus, elongation at break and stress at break were calculated.

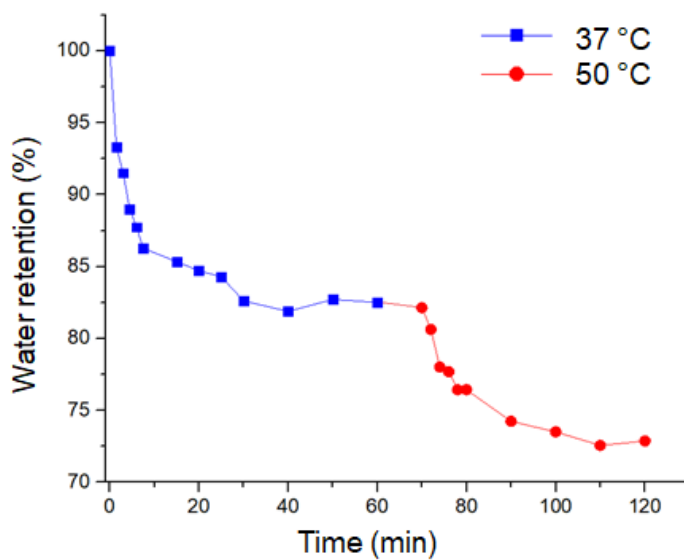

**Figure S2.** Deswelling experiment conducted at 37 and 50 °C, consecutively.

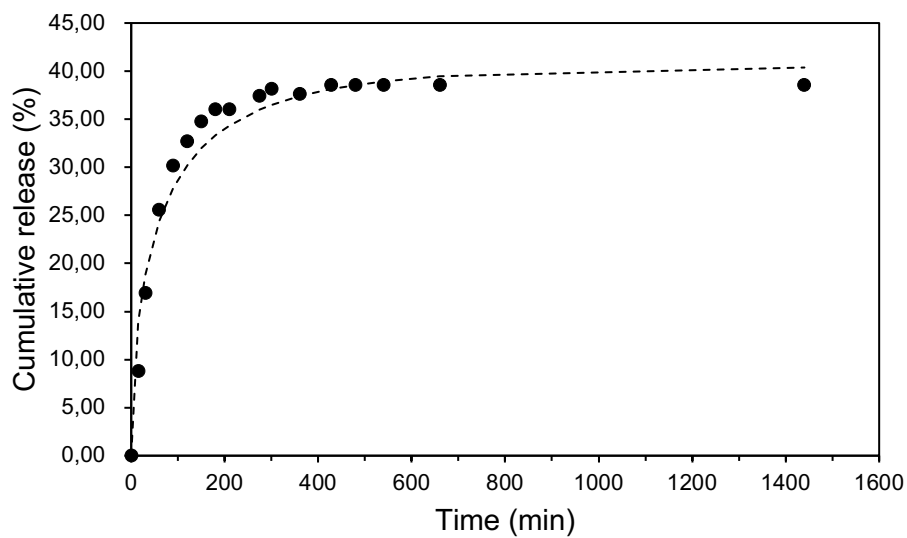

**Figure S3.** Cumulative DOX release profile over time at 37 °C (black filled dots) and Weibull fitting curve (dashed line).

**Table S1.** *In vitro* dissolution parameters for DOX release.

| Equation                                                              | Correlation coefficient (R <sup>2</sup> ) | Constants (K)                                     | Exponent  |
|-----------------------------------------------------------------------|-------------------------------------------|---------------------------------------------------|-----------|
| Peppas-Sahlin<br>$\frac{M_t}{M_\infty} = K_1 \times t^m + K_2 t^{2m}$ | 0.97                                      | K <sub>1</sub> = 4.535<br>K <sub>2</sub> = -0.122 | m = 0.45  |
| Weibull<br>$\frac{M_t}{M_\infty} = \alpha \times (1 - \exp(-(kt^b)))$ | 0.98                                      | $\alpha$ = 40.517<br>K = 11.131                   | b = 0.569 |
| Korsmeyer-Peppas<br>$\frac{M_t}{M_\infty} = K_{KP} \times t^n$        | 0.89                                      | K <sub>KP</sub> = 6.684                           | n = 0.291 |

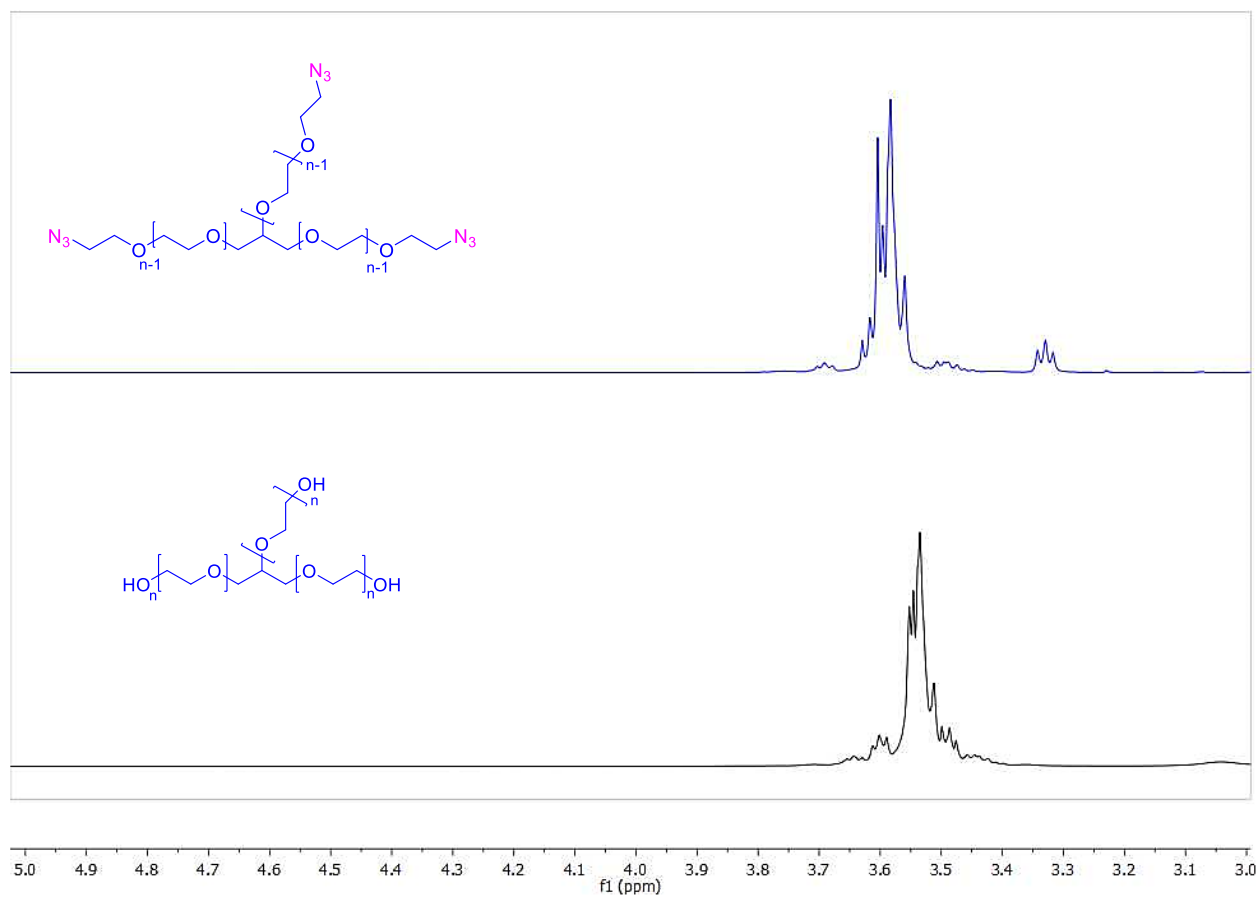

**Figure S4.** <sup>1</sup>H NMR spectra of triazide derivative of glycerol ethoxylate (**1a**) (*top*) and glycerol ethoxylate derivative (*bottom*) (solvent = CDCl<sub>3</sub>).

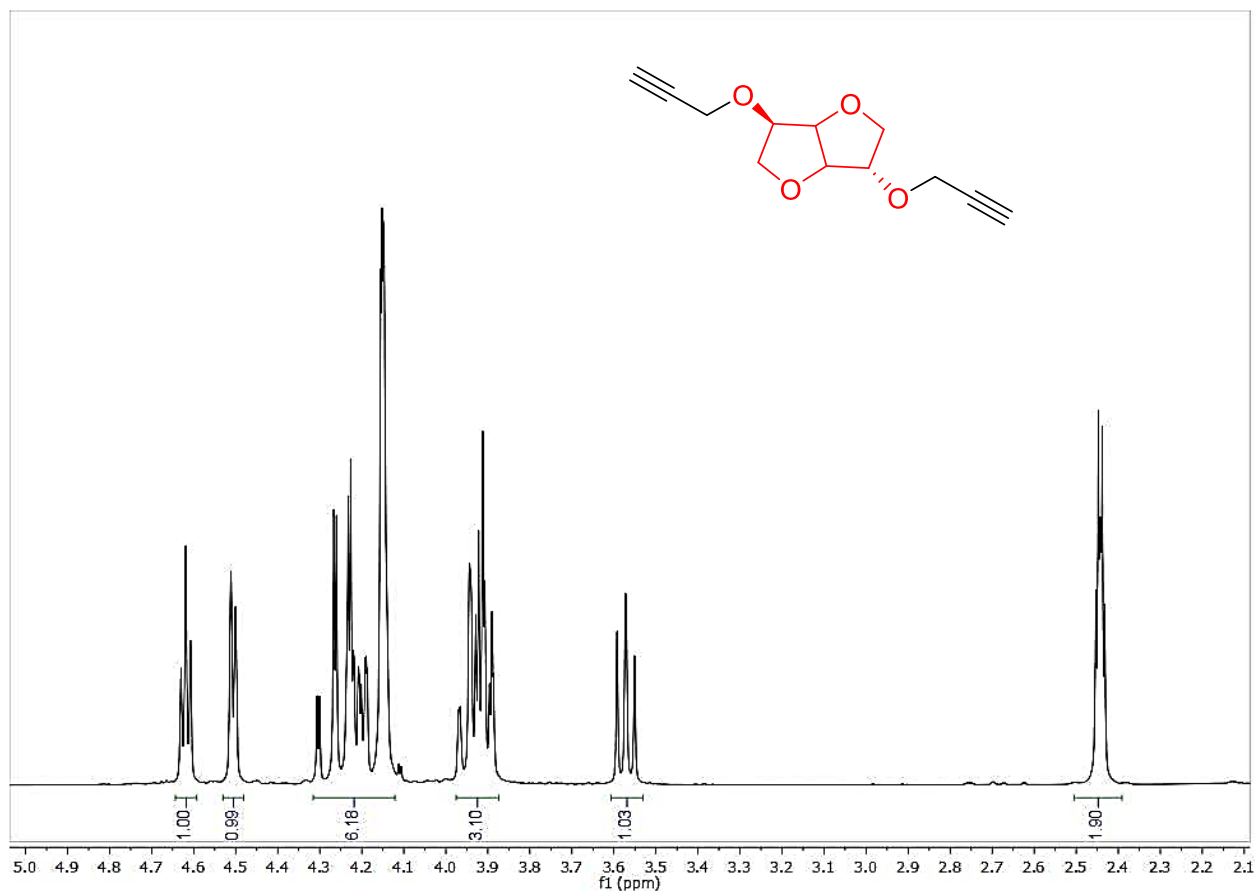

**Figure S5.** <sup>1</sup>H NMR spectrum of bis(alkyne) isosorbide (**1b**) (solvent = CDCl<sub>3</sub>).

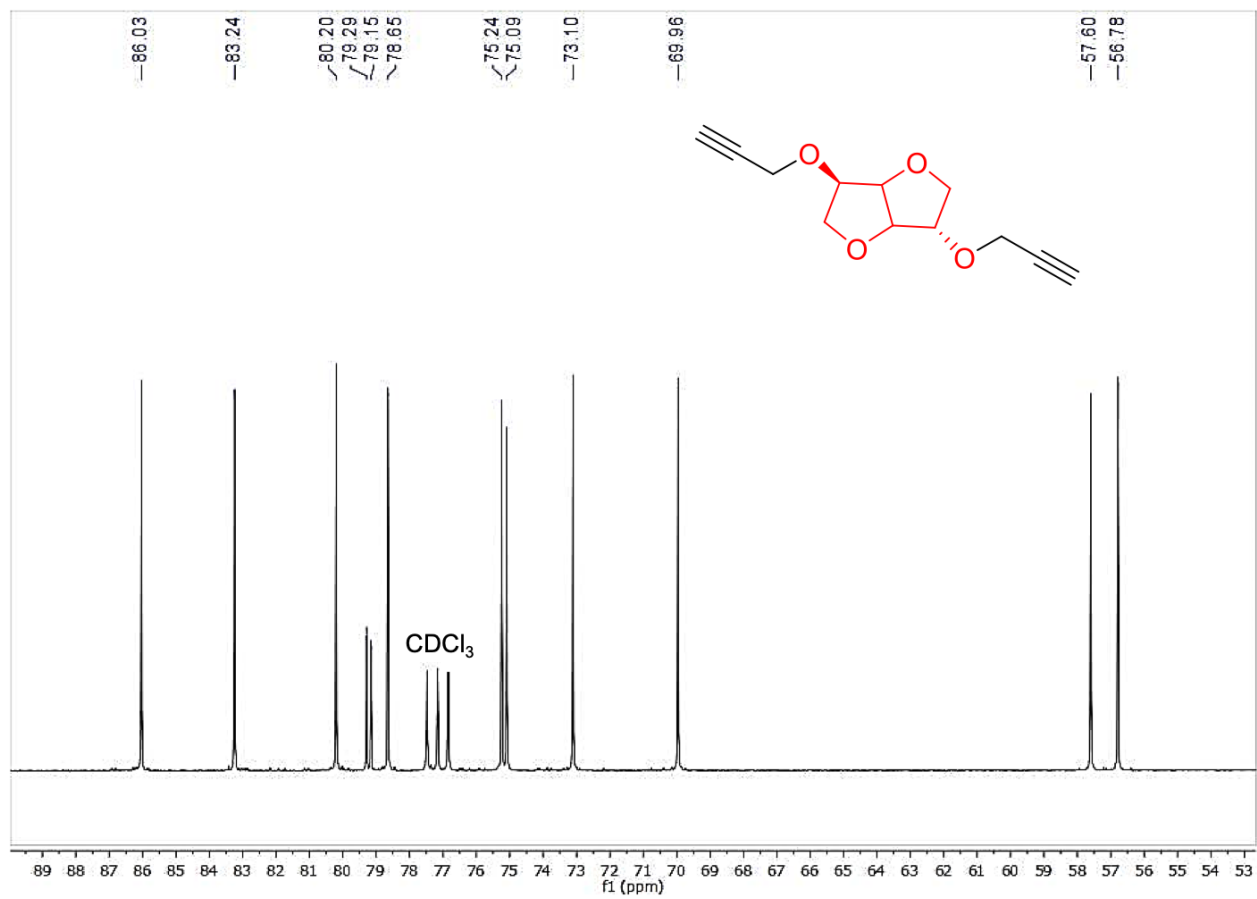

**Figure S6.**  $^{13}\text{C}$  NMR spectrum bis(alkyne) isosorbide (**1b**) (solvent =  $\text{CDCl}_3$ ).
